# Supplementary material
Source: PubMed Central journal article supplement (PMC4385192)
Supplement: mmc1.pdf [file mmc1.pdf]

The American Journal of Human Genetics

Supplemental Data

**Mutations in *NDUFB11*, Encoding a Complex I  
Component of the Mitochondrial Respiratory Chain,  
Cause Microphthalmia with Linear Skin Defects Syndrome**

Vanessa A. van Rahden, Erika Fernandez-Vizarra, Malik Alawi, Kristina Brand, Florence  
Fellmann, Denise Horn, Massimo Zeviani, and Kerstin Kutsche

## Supplemental Data

Figure S1

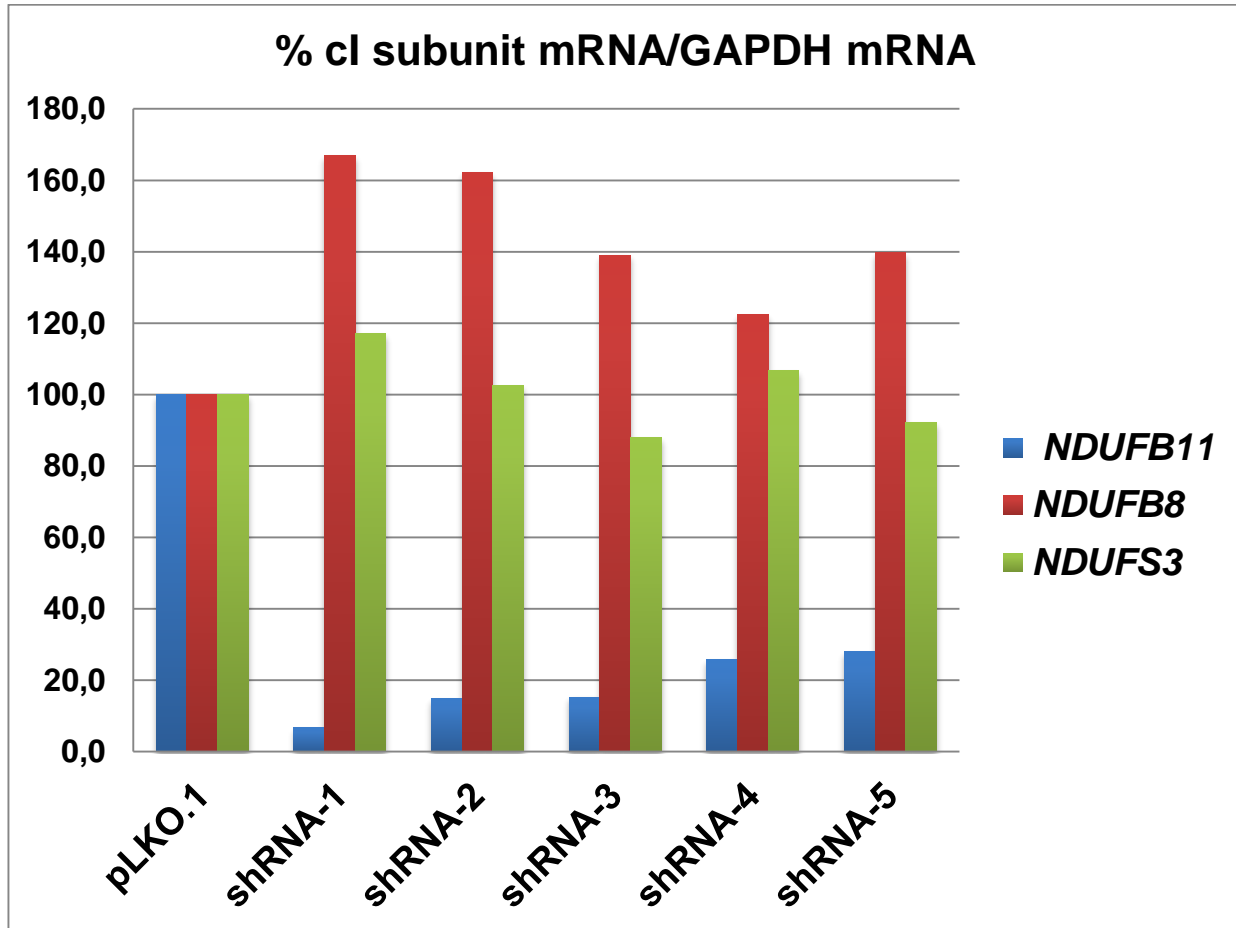

Figure S1: Quantitative PCR analysis of three complex I transcripts in *NDUFB11* knockdown and control HeLa cells

Values obtained from complex I transcripts specific to *NDUFB11*, *NDUFB8* and *NDUFS3* were normalized to the levels of *GAPDH* mRNA. The values obtained in *NDUFB11* shRNA-transduced (shRNA-1 to -5) cells are expressed as percentages relative to those obtained in cells transduced with the empty vector (pLKO.1). Each assay was performed in triplicate using TaqMan® Gene Expression Assays (Life Technologies) using cDNA generated from total RNA samples.

Figure S2

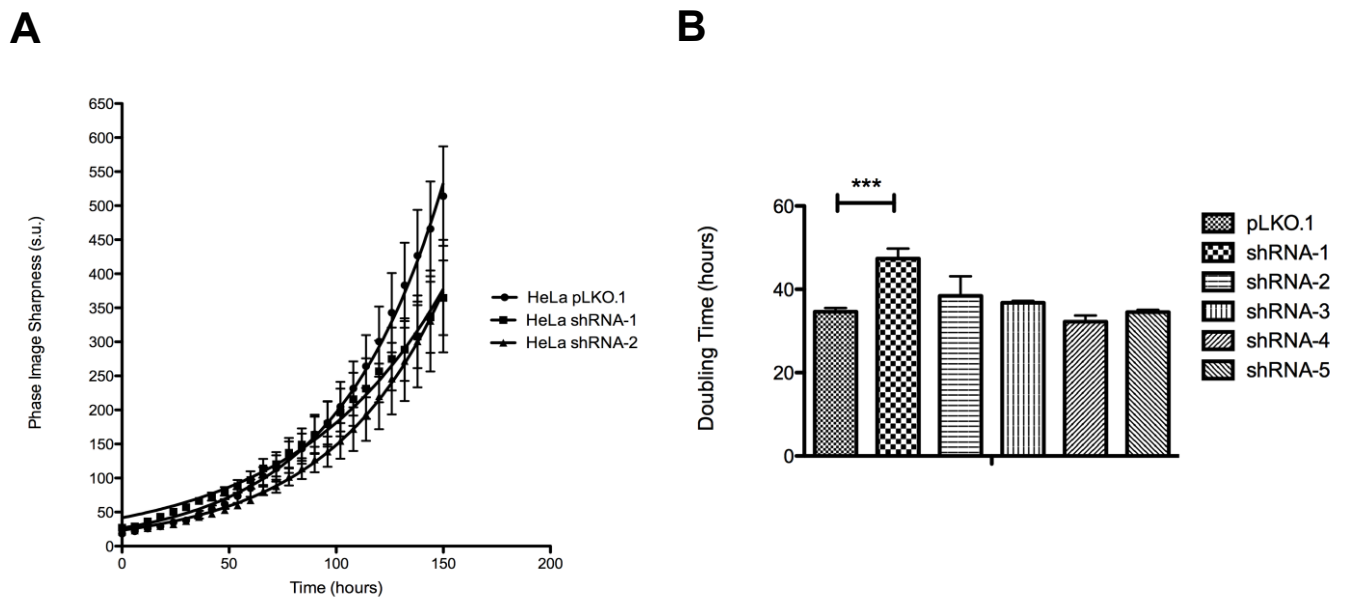

Figure S2: Growth curves of *NDUFB11* knockdown and control HeLa cells

(A) Growth curves of *NDUFB11* shRNA-transduced (shRNA-1 to -5) and control (pLKO.1) cells were obtained by IncuCyte ZOOM (Essen BioScience), which measured cell confluence every 6 hours for a period of 7 days. (B) Cell doubling time. For each HeLa cell line, four separate wells were measured. \*\*\*ANOVA  $p < 0.001$ .

Table S1: Read depth for whole exome sequencing in subjects 1 and 2

|                                       | Subject 1 | Subject 2 | X chromosome (hg19)     |
|---------------------------------------|-----------|-----------|-------------------------|
| Mean read depth across exome          | 97        | 99        |                         |
| Mean read depth across <i>NDUFB11</i> | 116       | 133       | 47,001,716 – 47,004,078 |
| Mean read depth across <i>ARSH</i>    | 59        | 61        | 2,924,654 – 2,951,426   |
| Mean read depth across <i>DGKK</i>    | 57        | 54        | 50,111,939 – 50,213,677 |
| Mean read depth across <i>DCAF8L2</i> | 442       | 459       | 27,765,013 – 27,766,908 |

Table S2: Private and rare X-linked sequence variants identified by whole exome sequencing in subjects 1 and 2

|                                          | Subject 1       | Subject 2                     |              |                                                   |
|------------------------------------------|-----------------|-------------------------------|--------------|---------------------------------------------------|
| Chromosome                               | X               | X                             | X            | X                                                 |
| Position                                 | 47002089        | 47001806                      | 2951233      | 50117973                                          |
| Gene                                     | <i>NDUFB11</i>  | <i>NDUFB11</i>                | <i>ARSH</i>  | <i>DGKK</i>                                       |
| Sequence variant                         | c.[=/262C>T]    | c.402delG                     | c.1496A>G    | c.3498G>T                                         |
| Amino acid change                        | p.[=/Arg88*]    | p.Arg134Serfs*3               | p.Asn499Ser  | p.Lys1166Asn                                      |
| Variant type                             | nonsense        | 1 bp deletion<br>(frameshift) | missense     | missense                                          |
| Sanger sequencing                        |                 |                               |              |                                                   |
| patient                                  | +               | +                             | +            | +                                                 |
| mother                                   | –               | +                             | +            | +                                                 |
| father                                   | –               | –                             | –            | –                                                 |
| <b>Pathogenicity prediction programs</b> |                 |                               |              |                                                   |
| <i>MutationTaster</i>                    | disease causing | disease causing               | polymorphism | na                                                |
| <i>SIFT</i>                              | na              | na                            | tolerated    | tolerated                                         |
| <i>SNAP</i>                              | na              | na                            | neutral      | neutral                                           |
| <i>PolyPhen-2</i>                        | na              | na                            | benign       | benign                                            |
| <b>OMIM disorder</b>                     | no              | no                            | no           | MIM 300856:<br>major risk gene<br>for hypospadias |
| <b>1000 Genomes</b>                      | absent          | absent                        | absent       | absent                                            |
| <b>EVS</b>                               | absent          | absent                        | absent       | absent                                            |
| <b>ExAc</b>                              | absent          | absent                        | absent       | MAF: 2.726e-05                                    |

X-chromosomal sequences were mapped to hg19 and positions of the sequence variants are given. Sequence variants were analyzed by the MutationTaster, SIFT, PolyPhen-2, and SNAP programs to predict a possible impact on protein function. When the program offered a choice of parameter settings, defaults were used. *Tolerated*, *polymorphism*, *benign* and *neutral* indicate that the change on protein level is unlikely to affect protein function. *Disease causing* indicates a likely impact of the amino acid alteration on protein function. + : variant present; – : variant absent; EVS: the National Heart, Lung, and Blood Institute (NHLBI) Exome Sequencing Project Exome Variant Server; ExAC: Exome Aggregation Consortium Browser; MAF: minor allele frequency; na: not applicable.

Table S3: Mitochondrial respiratory chain (MRC) activities in cultured skin fibroblasts of subject 1

| MRC complex                                       | Activity normalized to citrate synthase (CS) activity |                          |
|---------------------------------------------------|-------------------------------------------------------|--------------------------|
|                                                   | Fibroblasts of subject 1                              | Fibroblast control range |
| cI (NADH:CoQ1 oxidoreductase)                     | 15.6 ± 5.4                                            | 10.3 - 22                |
| cII (Succinate dehydrogenase)                     | 13.4 ± 7.6                                            | 5.5 - 10.9               |
| cII (Succinate:CoQ1 oxidoreductase)               | 23.7 ± 10.4                                           | 8.8 - 16.9               |
| cIII (Decylubiquinol:cytochrome c oxidoreductase) | 12.9 ± 5.2                                            | 9.2 - 17.5               |
| cIV (cytochrome c oxidase)                        | 23.9 ± 7.8                                            | 23.5 - 26.4              |

Measures were performed in triplicate in each of two biological replicates.

Table S4: MRC activities in *NDUFB11* shRNA-1 cells in comparison with control cells (HeLa pLKO.1)

| MRC complex                                       | Activity referred to citrate synthase (CS) activity |                           |
|---------------------------------------------------|-----------------------------------------------------|---------------------------|
|                                                   | <i>NDUFB11</i> shRNA-1 cells                        | HeLa pLKO.1 control range |
| cI (NADH:CoQ1 oxidoreductase)                     | 1.4                                                 | 10.5 - 12.5               |
| cII (Succinate dehydrogenase)                     | 8.1                                                 | 2.3 - 7.8                 |
| cII (Succinate:CoQ1 oxidoreductase)               | 16.0                                                | 7.7 - 16.1                |
| cIII (Decylubiquinol:cytochrome c oxidoreductase) | 12.3                                                | 14.3 - 25.5               |
| cIV (cytochrome c oxidase)                        | 23.3                                                | 25.6 - 27.8               |

Measures in shRNA-1 HeLa cells were performed in triplicate in one sample. Measures in HeLa pLKO.1 cells were performed in triplicate in two different samples.
